# Supplementary material for: Loda: Lightweight on-line detector of anomalies
Source: Springer Nature journal article supplement (doi:10.1007/s10994-015-5521-0), 2015-07-20
Supplement: 10994_2015_5521_MOESM1_ESM.pdf [file 10994_2015_5521_MOESM1_ESM.pdf]

## Tables with detectors AUCs on stationary data.

Tomáš Pevný

May 22, 2015

| problem       | KNN          | LODA  | PCA          | iForest | FRAC  | LOF   | OCSVM |
|---------------|--------------|-------|--------------|---------|-------|-------|-------|
| breast-tissue | 0.952        | 0.958 | <b>0.962</b> | 0.942   | 0.937 | 0.942 | 0.944 |
| ecoli         | <b>0.825</b> | 0.812 | 0.771        | 0.817   | 0.687 | 0.722 | 0     |
| ionosphere    | <b>0.993</b> | 0.978 | 0            | 0.952   | 0.990 | 0.983 | 0     |
| average rank  | 1.833        | 2.667 | 4            | 4.167   | 4.333 | 4.667 | 6.333 |

Table 1: Medium scattered anomalies at rate 0 within the training data.

| problem         | FRAC         | OCSVM | PCA          | KNN   | LOF   | LODA  | iForest |
|-----------------|--------------|-------|--------------|-------|-------|-------|---------|
| statlog-segment | <b>0.857</b> | 0.832 | 0.788        | 0.841 | 0.836 | 0.772 | 0.754   |
| yeast           | 0.782        | 0.797 | <b>0.800</b> | 0.768 | 0.740 | 0.781 | 0.747   |
| average rank    | 2.250        | 2.750 | 3.250        | 3.750 | 4.750 | 4.750 | 6.500   |

Table 2: Medium scattered anomalies at rate 0.005 within the training data.

| problem                 | OCSVM        | KNN   | iForest      | PCA          | LOF   | LODA         | FRAC         |
|-------------------------|--------------|-------|--------------|--------------|-------|--------------|--------------|
| blood-transfusion       | <b>0.867</b> | 0.807 | 0.828        | 0.806        | 0.828 | 0.767        | 0.563        |
| breast-cancer-wisconsin | 0.941        | 0.946 | <b>0.958</b> | 0.927        | 0.935 | 0.956        | 0.912        |
| statlog-segment         | 0.826        | 0.819 | 0.761        | 0.789        | 0.817 | 0.768        | <b>0.857</b> |
| vertebral-column        | 0.773        | 0.844 | 0.886        | 0.823        | 0.773 | <b>0.904</b> | 0.769        |
| yeast                   | 0.845        | 0.838 | 0.812        | <b>0.861</b> | 0.836 | 0.813        | 0.836        |
| average rank            | 3.100        | 3.600 | 3.900        | 4.100        | 4.100 | 4.200        | 5            |

Table 3: Medium scattered anomalies at rate 0.01 within the training data.

| problem                 | KNN          | iForest      | LODA         | LOF   | FRAC  | PCA   | OCSVM |
|-------------------------|--------------|--------------|--------------|-------|-------|-------|-------|
| breast-cancer-wisconsin | 0.918        | 0.933        | <b>0.935</b> | 0.899 | 0.871 | 0.888 | 0.916 |
| breast-tissue           | 0.940        | <b>0.954</b> | 0.947        | 0.915 | 0.899 | 0.932 | 0.890 |
| ecoli                   | <b>0.829</b> | 0.817        | 0.810        | 0.754 | 0.748 | 0.806 | 0.383 |
| ionosphere              | <b>0.994</b> | 0.963        | 0.977        | 0.983 | 0.990 | 0.922 | 0.922 |
| average rank            | 2.250        | 2.500        | 2.500        | 4.750 | 5     | 5     | 6     |

Table 4: Medium scattered anomalies at rate 0.05 within the training data.

| problem      | FRAC  | PCA          | KNN          | OCSVM        | LOF   | LODA  | iForest |
|--------------|-------|--------------|--------------|--------------|-------|-------|---------|
| ionosphere   | 0.990 | <b>0.994</b> | <b>0.994</b> | <b>0.994</b> | 0.976 | 0.967 | 0.949   |
| average rank | 2.500 | 2.500        | 2.500        | 2.500        | 5     | 6     | 7       |

Table 5: Medium scattered anomalies at rate 0.1 within the training data.

| problem                 | KNN          | OCSVM        | LOF          | LODA         | iForest      | PCA          | FRAC         |
|-------------------------|--------------|--------------|--------------|--------------|--------------|--------------|--------------|
| abalone                 | <b>0.548</b> | 0.503        | 0.545        | <b>0.548</b> | 0.525        | 0.526        | 0.528        |
| blood-transfusion       | 0.494        | 0.507        | 0.473        | 0.547        | <b>0.549</b> | 0.470        | 0.491        |
| breast-cancer-wisconsin | 0.970        | 0.968        | 0.966        | <b>0.975</b> | 0.970        | 0.973        | 0.952        |
| breast-tissue           | 0.960        | 0.957        | 0.939        | 0.968        | 0.943        | <b>0.969</b> | 0.945        |
| ecoli                   | <b>0.833</b> | 0            | 0.760        | 0.797        | 0.801        | 0.800        | 0.753        |
| glass                   | 0.694        | 0.762        | 0.727        | 0.641        | 0.561        | 0.780        | <b>0.790</b> |
| haberman                | 0.799        | 0.674        | 0.808        | 0.797        | <b>0.817</b> | 0.727        | 0.796        |
| ionosphere              | <b>0.973</b> | 0            | 0.940        | 0.946        | 0.874        | 0            | 0.952        |
| isolet                  | 0.722        | <b>0.766</b> | 0.749        | 0.559        | 0.565        | 0.616        | 0.590        |
| letter-recognition      | 0.763        | <b>0.795</b> | 0.783        | 0.602        | 0.577        | 0.671        | 0.632        |
| libras                  | 0.626        | <b>0.745</b> | 0.551        | 0.584        | 0.587        | 0.493        | 0.498        |
| madelon                 | <b>0.532</b> | 0.531        | 0.531        | 0.514        | 0.516        | 0.521        | 0.516        |
| multiple-features       | 0.965        | <b>0.983</b> | 0.956        | 0.764        | 0.805        | 0.870        | 0.524        |
| pendigits               | 0.976        | <b>0.983</b> | 0.977        | 0.902        | 0.908        | 0.908        | 0.885        |
| pima-indians            | 0.790        | 0.761        | 0.745        | 0.788        | <b>0.791</b> | 0.780        | 0.768        |
| sonar                   | 0.731        | <b>0.760</b> | 0.655        | 0.662        | 0.683        | 0.739        | 0.507        |
| statlog-segment         | 0.744        | 0.736        | 0.737        | 0.677        | 0.643        | 0.697        | <b>0.800</b> |
| statlog-vehicle         | <b>0.655</b> | 0.575        | 0.610        | 0.651        | 0.649        | 0.613        | 0.585        |
| synthetic-control-chart | 0.961        | 0.973        | <b>0.987</b> | 0.897        | 0.893        | 0.876        | 0.830        |
| vertebral-column        | 0.633        | 0.557        | 0.567        | <b>0.688</b> | 0.671        | 0.598        | 0.549        |
| wall-following-robot    | 0.590        | 0.577        | 0.593        | <b>0.709</b> | 0.599        | 0.557        | 0.569        |
| waveform-2              | 0.722        | 0.718        | 0.664        | <b>0.849</b> | 0.838        | 0.691        | 0.593        |
| wine                    | 0.919        | <b>0.934</b> | 0.870        | 0.893        | 0.898        | 0.921        | 0.869        |
| yeast                   | 0.757        | 0.689        | <b>0.769</b> | 0.718        | 0.720        | 0.759        | 0.767        |
| average rank            | 2.833        | 3.729        | 3.833        | 3.875        | 4.125        | 4.396        | 5.208        |

Table 6: Low scattered anomalies at rate 0 within the training data.

| problem              | KNN          | LOF          | OCSVM        | LODA         | PCA          | iForest      | FRAC         |
|----------------------|--------------|--------------|--------------|--------------|--------------|--------------|--------------|
| abalone              | <b>0.712</b> | 0.708        | 0.666        | 0.692        | 0.697        | 0.687        | 0.658        |
| cardiotocography     | 0.663        | 0.684        | <b>0.714</b> | 0.690        | 0.632        | 0.697        | 0.553        |
| gissette             | 0.822        | 0.827        | 0            | 0.781        | <b>0.838</b> | 0.527        | 0.576        |
| isolet               | 0.742        | 0.760        | <b>0.770</b> | 0.597        | 0.625        | 0.591        | 0.594        |
| letter-recognition   | 0.773        | 0.795        | <b>0.801</b> | 0.621        | 0.674        | 0.579        | 0.632        |
| madelon              | 0.612        | 0.607        | <b>0.614</b> | 0.574        | 0.585        | 0.558        | 0.556        |
| multiple-features    | 0.966        | 0.958        | <b>0.975</b> | 0.759        | 0.873        | 0.821        | 0.540        |
| pendigits            | 0.939        | <b>0.951</b> | 0.913        | 0.785        | 0.825        | 0.807        | 0.810        |
| statlog-segment      | 0.845        | 0.835        | 0.846        | 0.792        | 0.776        | 0.772        | <b>0.854</b> |
| statlog-vehicle      | 0.593        | 0.556        | 0.530        | <b>0.647</b> | 0.543        | <b>0.647</b> | 0.491        |
| wall-following-robot | 0.627        | 0.580        | 0.629        | <b>0.744</b> | 0.598        | 0.658        | 0.603        |
| waveform-1           | 0.694        | 0.643        | 0.688        | <b>0.833</b> | 0.678        | <b>0.833</b> | 0.589        |
| waveform-2           | 0.707        | 0.650        | 0.700        | <b>0.835</b> | 0.694        | 0.834        | 0.596        |
| yeast                | <b>0.714</b> | 0.713        | 0.654        | 0.690        | 0.696        | 0.681        | 0.707        |
| average rank         | 2.821        | 3.321        | 3.393        | 3.964        | 4.321        | 4.500        | 5.679        |

Table 7: Low scattered anomalies at rate 0.005 within the training data.

| problem                 | KNN          | LODA         | LOF          | iForest      | OCSVM        | PCA          | FRAC         |
|-------------------------|--------------|--------------|--------------|--------------|--------------|--------------|--------------|
| abalone                 | <b>0.726</b> | 0.689        | 0.716        | 0.679        | 0.664        | 0.705        | 0.672        |
| blood-transfusion       | 0.814        | 0.826        | 0.798        | <b>0.838</b> | 0.788        | 0.764        | 0.663        |
| breast-cancer-wisconsin | 0.958        | <b>0.966</b> | 0.953        | <b>0.966</b> | 0.947        | 0.940        | 0.920        |
| cardiotocography        | 0.622        | 0.669        | 0.664        | 0.678        | <b>0.687</b> | 0.588        | 0.517        |
| isolet                  | 0.728        | 0.578        | 0.752        | 0.572        | <b>0.762</b> | 0.630        | 0.605        |
| letter-recognition      | 0.760        | 0.607        | 0.785        | 0.577        | <b>0.789</b> | 0.663        | 0.623        |
| madelon                 | <b>0.593</b> | 0.531        | 0.591        | 0.525        | 0.591        | 0.562        | 0.539        |
| multiple-features       | <b>0.961</b> | 0.754        | 0.951        | 0.814        | <b>0.961</b> | 0.841        | 0.516        |
| pendigits               | 0.942        | 0.799        | <b>0.952</b> | 0.823        | 0.901        | 0.838        | 0.818        |
| pima-indians            | 0.785        | <b>0.791</b> | 0.741        | <b>0.791</b> | 0.755        | 0.781        | 0.770        |
| statlog-segment         | 0.762        | 0.698        | 0.747        | 0.669        | 0.757        | 0.707        | <b>0.799</b> |
| statlog-vehicle         | 0.597        | <b>0.634</b> | 0.575        | 0.630        | 0.526        | 0.545        | 0.502        |
| synthetic-control-chart | 0.969        | 0.906        | <b>0.990</b> | 0.906        | 0.976        | 0.879        | 0.826        |
| vertebral-column        | 0.667        | <b>0.701</b> | 0.608        | 0.698        | 0.586        | 0.638        | 0.581        |
| wall-following-robot    | 0.613        | <b>0.730</b> | 0.574        | 0.647        | 0.604        | 0.591        | 0.596        |
| waveform-1              | 0.683        | <b>0.816</b> | 0.632        | 0.814        | 0.677        | 0.670        | 0.585        |
| waveform-2              | 0.676        | <b>0.824</b> | 0.616        | 0.820        | 0.668        | 0.665        | 0.568        |
| yeast                   | 0.736        | 0.706        | <b>0.742</b> | 0.710        | 0.696        | <b>0.742</b> | 0.736        |
| average rank            | 2.722        | 3.694        | 3.722        | 3.778        | 3.778        | 4.611        | 5.694        |

Table 8: Low scattered anomalies at rate 0.01 within the training data.

| problem                 | KNN          | LODA         | iForest      | LOF          | OCSVM        | PCA          | FRAC         |
|-------------------------|--------------|--------------|--------------|--------------|--------------|--------------|--------------|
| abalone                 | 0.542        | <b>0.548</b> | 0.523        | 0.540        | 0.504        | 0.523        | 0.524        |
| blood-transfusion       | 0.508        | <b>0.598</b> | 0.587        | 0.485        | 0.503        | 0.481        | 0.494        |
| breast-cancer-wisconsin | 0.930        | 0.950        | <b>0.958</b> | 0.921        | 0.926        | 0.917        | 0.887        |
| breast-tissue           | 0.931        | <b>0.948</b> | 0.944        | 0.879        | 0.899        | 0.946        | 0.905        |
| ecoli                   | <b>0.810</b> | 0.789        | 0.795        | 0.754        | —            | 0.800        | 0.746        |
| glass                   | 0.688        | 0.608        | 0.593        | 0.739        | 0.718        | 0.773        | <b>0.791</b> |
| haberman                | 0.800        | 0.798        | <b>0.820</b> | 0.797        | 0.633        | 0.720        | 0.808        |
| ionosphere              | <b>0.963</b> | 0.909        | 0.850        | 0.928        | 0.567        | 0.567        | 0.947        |
| isolet                  | 0.699        | 0.560        | 0.556        | <b>0.739</b> | 0.731        | 0.600        | 0.579        |
| letter-recognition      | 0.747        | 0.595        | 0.574        | <b>0.775</b> | 0.765        | 0.647        | 0.608        |
| libras                  | 0.611        | 0.583        | 0.591        | 0.549        | <b>0.722</b> | 0.476        | 0.477        |
| madelon                 | <b>0.536</b> | 0.526        | 0.521        | 0.535        | 0.534        | 0.526        | 0.520        |
| multiple-features       | 0.906        | 0.735        | 0.778        | <b>0.914</b> | 0.885        | 0.646        | 0.515        |
| pendigits               | 0.946        | 0.863        | 0.894        | <b>0.959</b> | 0.822        | 0.874        | 0.832        |
| pima-indians            | 0.766        | 0.776        | <b>0.778</b> | 0.711        | 0.727        | 0.766        | 0.753        |
| sonar                   | 0.715        | 0.643        | 0.666        | 0.649        | <b>0.741</b> | 0.717        | 0.515        |
| statlog-segment         | 0.665        | 0.595        | 0.580        | 0.660        | 0.723        | 0.648        | <b>0.752</b> |
| statlog-vehicle         | 0.637        | <b>0.644</b> | 0.640        | 0.600        | 0.565        | 0.588        | 0.565        |
| synthetic-control-chart | 0.949        | 0.872        | 0.888        | <b>0.982</b> | 0.962        | 0.870        | 0.795        |
| vertebral-column        | 0.623        | <b>0.681</b> | 0.660        | 0.554        | 0.550        | 0.588        | 0.542        |
| wall-following-robot    | 0.578        | <b>0.677</b> | 0.587        | 0.584        | 0.561        | 0.553        | 0.560        |
| waveform-2              | 0.743        | <b>0.855</b> | 0.838        | 0.683        | 0.724        | 0.724        | 0.636        |
| wine                    | 0.923        | 0.884        | 0.900        | 0.868        | <b>0.931</b> | 0.897        | 0.835        |
| yeast                   | 0.668        | 0.666        | 0.679        | 0.650        | 0.651        | <b>0.718</b> | 0.707        |
| average rank            | 2.792        | 3.625        | 3.646        | 4.104        | 4.333        | 4.354        | 5.146        |

Table 9: Low scattered anomalies at rate 0.05 within the training data.

| problem                 | KNN          | LOF          | iForest      | LODA         | PCA          | OCSVM        | FRAC         |
|-------------------------|--------------|--------------|--------------|--------------|--------------|--------------|--------------|
| abalone                 | <b>0.546</b> | 0.537        | 0.517        | 0.540        | 0.528        | 0.499        | 0.532        |
| breast-cancer-wisconsin | 0.873        | 0.724        | <b>0.940</b> | 0.930        | 0.893        | 0.887        | 0.865        |
| breast-tissue           | 0.941        | 0.861        | <b>0.972</b> | 0.963        | 0.945        | 0.928        | 0.929        |
| ecoli                   | 0.756        | 0.699        | <b>0.767</b> | 0.766        | 0.757        | 0.173        | 0.699        |
| glass                   | 0.670        | 0.723        | 0.613        | 0.581        | 0.750        | 0.685        | <b>0.761</b> |
| ionosphere              | <b>0.951</b> | 0.916        | 0.836        | 0.900        | 0.797        | 0.788        | 0.937        |
| isolet                  | 0.668        | <b>0.718</b> | 0.544        | 0.543        | 0.572        | 0.692        | 0.553        |
| letter-recognition      | 0.726        | <b>0.760</b> | 0.568        | 0.586        | 0.627        | 0.735        | 0.593        |
| libras                  | 0.595        | 0.567        | 0.592        | 0.584        | 0.448        | <b>0.686</b> | 0.443        |
| madelon                 | <b>0.528</b> | <b>0.528</b> | 0.517        | 0.510        | 0.521        | <b>0.528</b> | 0.517        |
| multiple-features       | <b>0.822</b> | 0.817        | 0.744        | 0.707        | 0.652        | 0.809        | 0.583        |
| pendigits               | 0.882        | <b>0.908</b> | 0.870        | 0.835        | 0.840        | 0.755        | 0.784        |
| pima-indians            | 0.761        | 0.678        | <b>0.790</b> | <b>0.790</b> | 0.774        | 0.717        | 0.756        |
| sonar                   | 0.713        | 0.650        | 0.648        | 0.640        | 0.698        | <b>0.737</b> | 0.576        |
| statlog-segment         | <b>0.883</b> | 0.811        | 0.835        | 0.868        | 0.763        | 0.790        | 0.810        |
| statlog-vehicle         | 0.614        | 0.555        | 0.623        | <b>0.636</b> | 0.551        | 0.534        | 0.525        |
| synthetic-control-chart | 0.932        | <b>0.971</b> | 0.865        | 0.843        | 0.859        | 0.947        | 0.756        |
| vertebral-column        | 0.612        | 0.543        | 0.644        | <b>0.664</b> | 0.582        | 0.544        | 0.540        |
| wall-following-robot    | 0.574        | 0.592        | 0.582        | <b>0.656</b> | 0.544        | 0.568        | 0.551        |
| wine                    | 0.923        | <b>0.962</b> | 0.890        | 0.860        | 0.927        | 0.932        | 0.860        |
| yeast                   | 0.644        | 0.593        | 0.673        | 0.663        | <b>0.722</b> | 0.656        | 0.688        |
| average rank            | 3.095        | 3.667        | 3.667        | 3.857        | 4.214        | 4.262        | 5.238        |

Table 10: Low scattered anomalies at rate 0.1 within the training data.

| problem                 | KNN          | OCSVM        | LODA         | iForest      | LOF          | PCA          | FRAC         |
|-------------------------|--------------|--------------|--------------|--------------|--------------|--------------|--------------|
| abalone                 | 0.472        | 0.500        | 0.492        | <b>0.501</b> | 0.485        | 0.482        | 0.472        |
| blood-transfusion       | 0.499        | 0.550        | 0.527        | <b>0.561</b> | 0.506        | 0.510        | 0.377        |
| breast-cancer-wisconsin | 0.968        | 0.966        | <b>0.973</b> | 0.968        | 0.964        | 0.972        | 0.949        |
| breast-tissue           | <b>0.772</b> | 0.764        | 0.771        | 0.745        | 0.764        | 0.741        | 0.737        |
| cardiotocography        | 0.468        | 0.555        | 0.595        | <b>0.616</b> | 0.602        | 0.417        | 0.369        |
| ecoli                   | 0.610        | 0            | 0.678        | <b>0.681</b> | 0.502        | 0.600        | 0.551        |
| gisette                 | 0.546        | 0            | 0.488        | 0.293        | 0.545        | <b>0.604</b> | 0.508        |
| glass                   | 0.683        | 0.738        | 0.632        | 0.535        | 0.714        | 0.768        | <b>0.798</b> |
| haberman                | 0.680        | 0.557        | 0.671        | 0.706        | <b>0.707</b> | 0.583        | 0.677        |
| ionosphere              | 0.934        | 0            | <b>0.935</b> | 0.851        | 0.862        | 0            | 0.813        |
| iris                    | 0.875        | 0.867        | <b>0.966</b> | 0.876        | 0.738        | 0.530        | 0.590        |
| isolet                  | 0.619        | <b>0.680</b> | 0.460        | 0.455        | 0.650        | 0.519        | 0.505        |
| letter-recognition      | 0.677        | <b>0.721</b> | 0.534        | 0.493        | 0.690        | 0.582        | 0.548        |
| libras                  | 0.537        | <b>0.671</b> | 0.479        | 0.478        | 0.462        | 0.495        | 0.498        |
| madelon                 | 0.295        | 0.289        | 0.400        | 0.410        | 0.293        | 0.387        | <b>0.442</b> |
| multiple-features       | 0.963        | <b>0.981</b> | 0.756        | 0.799        | 0.953        | 0.866        | 0.531        |
| parkinsons              | 0.626        | <b>0.678</b> | 0.627        | 0.597        | 0.569        | 0.639        | 0.666        |
| pendigits               | 0.974        | 0.972        | 0.880        | 0.904        | <b>0.983</b> | 0.903        | 0.894        |
| pima-indians            | 0.566        | 0.512        | 0.572        | 0.573        | 0.538        | 0.565        | <b>0.581</b> |
| sonar                   | 0.614        | <b>0.654</b> | 0.582        | 0.587        | 0.564        | 0.618        | 0.510        |
| spect-heart             | 0.243        | 0.259        | 0.304        | <b>0.313</b> | 0.239        | 0.265        | 0.299        |
| statlog-satimage        | 0.938        | <b>0.957</b> | 0.889        | 0.907        | 0.944        | 0.438        | 0.412        |
| statlog-segment         | 0.926        | <b>0.930</b> | 0.922        | 0.872        | 0.904        | 0.825        | 0.888        |
| statlog-vehicle         | 0.640        | 0.549        | <b>0.643</b> | 0.631        | 0.573        | 0.625        | 0.611        |
| synthetic-control-chart | 0.943        | 0.963        | 0.859        | 0.855        | <b>0.984</b> | 0.838        | 0.783        |
| vertebral-column        | 0.555        | 0.458        | <b>0.652</b> | 0.603        | 0.456        | 0.519        | 0.511        |
| wall-following-robot    | 0.597        | 0.602        | <b>0.731</b> | 0.604        | 0.610        | 0.523        | 0.536        |
| waveform-1              | 0.719        | 0.722        | 0.809        | <b>0.818</b> | 0.676        | 0.580        | 0.499        |
| waveform-2              | 0.718        | 0.721        | 0.804        | <b>0.810</b> | 0.682        | 0.579        | 0.499        |
| wine                    | 0.968        | <b>0.982</b> | 0.933        | 0.860        | 0.973        | 0.961        | 0.906        |
| yeast                   | 0.443        | 0.427        | 0.421        | 0.423        | <b>0.456</b> | 0.445        | 0.434        |
| average rank            | 3.339        | 3.532        | 3.677        | 3.839        | 3.984        | 4.548        | 5.081        |

Table 11: Low clustered anomalies at rate 0 within the training data.

| problem              | LOF          | KNN          | LODA         | iForest      | OCSVM | PCA          | FRAC         |
|----------------------|--------------|--------------|--------------|--------------|-------|--------------|--------------|
| abalone              | 0.621        | <b>0.642</b> | 0.588        | 0.592        | 0.584 | 0.636        | 0.621        |
| cardiotocography     | 0.497        | 0.402        | 0.486        | <b>0.498</b> | 0.491 | 0.403        | 0.382        |
| gisette              | 0.528        | 0.525        | 0.490        | 0.332        | 0     | <b>0.562</b> | 0.501        |
| isolet               | <b>0.418</b> | 0.378        | 0.326        | 0.325        | 0.337 | 0.311        | 0.324        |
| letter-recognition   | <b>0.456</b> | 0.416        | 0.379        | 0.349        | 0.346 | 0.332        | 0.334        |
| madelon              | 0.303        | 0.294        | 0.414        | 0.411        | 0.295 | 0.372        | <b>0.427</b> |
| multiple-features    | <b>0.949</b> | 0.941        | 0.805        | 0.840        | 0.695 | 0.703        | 0.510        |
| pendigits            | <b>0.899</b> | 0.876        | 0.659        | 0.698        | 0.816 | 0.714        | 0.720        |
| statlog-satimage     | <b>0.758</b> | 0.732        | 0.648        | 0.667        | 0.680 | 0.529        | 0.502        |
| statlog-segment      | 0.742        | 0.745        | 0.635        | 0.593        | 0.680 | 0.637        | <b>0.782</b> |
| statlog-vehicle      | 0.530        | <b>0.547</b> | 0.542        | 0.539        | 0.462 | 0.520        | 0.479        |
| wall-following-robot | 0.523        | 0.539        | <b>0.667</b> | 0.571        | 0.527 | 0.505        | 0.523        |
| waveform-1           | 0.553        | 0.591        | <b>0.775</b> | 0.770        | 0.594 | 0.527        | 0.444        |
| waveform-2           | 0.549        | 0.580        | <b>0.776</b> | 0.775        | 0.585 | 0.521        | 0.433        |
| yeast                | <b>0.487</b> | 0.475        | 0.457        | 0.462        | 0.453 | 0.478        | 0.468        |
| average rank         | 2.667        | 2.933        | 3.800        | 3.900        | 4.800 | 4.867        | 5.033        |

Table 12: Low clustered anomalies at rate 0.005 within the training data.

| problem                 | LOF          | KNN          | iForest      | LODA         | OCSVM | PCA          | FRAC         |
|-------------------------|--------------|--------------|--------------|--------------|-------|--------------|--------------|
| abalone                 | 0.675        | <b>0.696</b> | 0.632        | 0.641        | 0.605 | 0.683        | 0.665        |
| blood-transfusion       | 0.699        | 0.698        | <b>0.732</b> | 0.701        | 0.731 | 0.683        | 0.528        |
| breast-cancer-wisconsin | 0.634        | 0.697        | 0.781        | 0.775        | 0.701 | <b>0.805</b> | 0.771        |
| cardiotocography        | 0.474        | 0.384        | <b>0.477</b> | 0.466        | 0.470 | 0.386        | 0.373        |
| isolet                  | <b>0.603</b> | 0.530        | 0.468        | 0.462        | 0.522 | 0.482        | 0.479        |
| letter-recognition      | <b>0.646</b> | 0.584        | 0.494        | 0.529        | 0.534 | 0.508        | 0.489        |
| madelon                 | 0.274        | 0.273        | 0.407        | 0.392        | 0.270 | 0.358        | <b>0.419</b> |
| multiple-features       | <b>0.931</b> | 0.882        | 0.820        | 0.771        | 0.574 | 0.630        | 0.490        |
| pendigits               | <b>0.931</b> | 0.906        | 0.726        | 0.691        | 0.833 | 0.749        | 0.749        |
| pima-indians            | 0.553        | 0.588        | 0.606        | <b>0.608</b> | 0.526 | 0.593        | 0.603        |
| statlog-satimage        | <b>0.751</b> | 0.719        | 0.659        | 0.645        | 0.674 | 0.515        | 0.494        |
| statlog-segment         | 0.732        | 0.717        | 0.560        | 0.598        | 0.650 | 0.617        | <b>0.767</b> |
| statlog-vehicle         | 0.533        | <b>0.538</b> | 0.531        | 0.536        | 0.457 | 0.509        | 0.469        |
| synthetic-control-chart | <b>0.986</b> | 0.942        | 0.887        | 0.881        | 0.961 | 0.866        | 0.782        |
| vertebral-column        | 0.511        | 0.584        | 0.624        | <b>0.647</b> | 0.505 | 0.575        | 0.550        |
| wall-following-robot    | 0.509        | 0.503        | 0.529        | <b>0.631</b> | 0.487 | 0.464        | 0.479        |
| waveform-1              | 0.572        | 0.608        | <b>0.779</b> | 0.775        | 0.613 | 0.548        | 0.469        |
| waveform-2              | 0.561        | 0.596        | <b>0.784</b> | <b>0.784</b> | 0.603 | 0.544        | 0.458        |
| yeast                   | <b>0.501</b> | 0.489        | 0.470        | 0.473        | 0.460 | 0.491        | 0.484        |
| average rank            | 3.211        | 3.237        | 3.500        | 3.658        | 4.579 | 4.658        | 5.158        |

Table 13: Low clustered anomalies at rate 0.01 within the training data.



| problem                 | LODA         | iForest      | KNN          | OCSVM        | PCA          | LOF          | FRAC         |
|-------------------------|--------------|--------------|--------------|--------------|--------------|--------------|--------------|
| abalone                 | 0.489        | 0.492        | 0.460        | <b>0.495</b> | 0.471        | 0.470        | 0.469        |
| blood-transfusion       | 0.504        | 0.530        | 0.465        | <b>0.543</b> | 0.481        | 0.469        | 0.340        |
| breast-cancer-wisconsin | 0.926        | <b>0.946</b> | 0.811        | 0.815        | 0.887        | 0.691        | 0.857        |
| breast-tissue           | 0.756        | 0.752        | <b>0.762</b> | 0.733        | 0.725        | 0.721        | 0.730        |
| cardiotocography        | 0.514        | <b>0.555</b> | 0.383        | 0.491        | 0.376        | 0.433        | 0.337        |
| ecoli                   | 0.660        | <b>0.661</b> | 0.575        | 0            | 0.579        | 0.500        | 0.535        |
| glass                   | 0.552        | 0.558        | 0.644        | 0.648        | 0.719        | 0.699        | <b>0.752</b> |
| haberman                | 0.684        | <b>0.705</b> | 0.661        | 0.540        | 0.568        | 0.679        | 0.679        |
| ionosphere              | 0.757        | 0.687        | <b>0.769</b> | 0.224        | 0.235        | 0.747        | 0.729        |
| iris                    | <b>0.889</b> | 0.866        | 0.864        | 0.716        | 0.530        | 0.751        | 0.586        |
| isolet                  | 0.412        | 0.416        | 0.480        | 0.501        | 0.450        | <b>0.535</b> | 0.457        |
| letter-recognition      | 0.425        | 0.419        | 0.456        | 0.466        | 0.449        | <b>0.501</b> | 0.451        |
| libras                  | 0.453        | 0.449        | 0.491        | <b>0.590</b> | 0.475        | 0.428        | 0.477        |
| madelon                 | 0.401        | 0.408        | 0.292        | 0.287        | 0.377        | 0.290        | <b>0.435</b> |
| multiple-features       | 0.642        | 0.660        | <b>0.696</b> | 0.657        | 0.550        | 0.572        | 0.509        |
| parkinsons              | 0.595        | 0.566        | 0.590        | <b>0.598</b> | 0.572        | 0.559        | 0.581        |
| pendigits               | 0.799        | <b>0.825</b> | 0.775        | 0.648        | 0.778        | 0.566        | 0.717        |
| pima-indians            | 0.556        | 0.557        | 0.537        | 0.477        | 0.544        | 0.496        | <b>0.560</b> |
| sonar                   | 0.555        | 0.568        | 0.572        | <b>0.594</b> | 0.580        | 0.532        | 0.500        |
| spect-heart             | 0.288        | 0.292        | 0.243        | 0.257        | 0.263        | 0.234        | <b>0.297</b> |
| statlog-satimage        | 0.836        | <b>0.850</b> | 0.721        | 0.715        | 0.426        | 0.695        | 0.406        |
| statlog-segment         | 0.881        | 0.852        | <b>0.897</b> | 0.820        | 0.773        | 0.852        | 0.841        |
| statlog-vehicle         | <b>0.617</b> | 0.588        | 0.561        | 0.481        | 0.545        | 0.513        | 0.524        |
| synthetic-control-chart | 0.793        | 0.817        | 0.831        | <b>0.873</b> | 0.769        | 0.621        | 0.632        |
| vertebral-column        | <b>0.637</b> | 0.588        | 0.538        | 0.448        | 0.502        | 0.431        | 0.495        |
| wall-following-robot    | <b>0.642</b> | 0.557        | 0.524        | 0.516        | 0.483        | 0.552        | 0.484        |
| waveform-1              | <b>0.771</b> | 0.770        | 0.614        | 0.624        | 0.551        | 0.564        | 0.489        |
| waveform-2              | <b>0.765</b> | 0.762        | 0.612        | 0.622        | 0.552        | 0.566        | 0.491        |
| wine                    | 0.865        | 0.867        | 0.903        | 0.874        | 0.855        | <b>0.959</b> | 0.750        |
| yeast                   | 0.407        | 0.411        | 0.425        | 0.418        | <b>0.433</b> | <b>0.433</b> | 0.421        |
| average rank            | 2.967        | 2.983        | 3.633        | 4.033        | 4.733        | 4.817        | 4.833        |

Table 14: Low clustered anomalies at rate 0.05 within the training data.

| problem                 | LODA         | iForest      | KNN          | OCSVM        | PCA          | LOF          | FRAC         |
|-------------------------|--------------|--------------|--------------|--------------|--------------|--------------|--------------|
| abalone                 | 0.441        | 0.441        | 0.458        | 0.463        | 0.467        | 0.462        | <b>0.486</b> |
| blood-transfusion       | 0.421        | 0.450        | 0.408        | <b>0.508</b> | 0.441        | 0.423        | 0.324        |
| breast-cancer-wisconsin | 0.900        | <b>0.916</b> | 0.750        | 0.761        | 0.854        | 0.394        | 0.823        |
| breast-tissue           | 0.649        | <b>0.650</b> | 0.646        | 0.621        | 0.621        | 0.541        | 0.625        |
| ecoli                   | 0.736        | <b>0.745</b> | 0.708        | 0            | 0.719        | 0.645        | 0.663        |
| glass                   | 0.478        | 0.483        | 0.575        | 0.603        | 0.671        | 0.660        | <b>0.696</b> |
| haberman                | 0.444        | 0.479        | 0.457        | 0.426        | 0.397        | <b>0.489</b> | 0.452        |
| ionosphere              | 0.818        | 0.721        | 0.821        | 0.114        | 0.120        | 0.744        | <b>0.841</b> |
| iris                    | 0.805        | 0.779        | <b>0.807</b> | 0.677        | 0.485        | 0.711        | 0.571        |
| isolet                  | 0.382        | 0.387        | 0.470        | 0.489        | 0.441        | <b>0.543</b> | 0.451        |
| letter-recognition      | 0.381        | 0.374        | 0.458        | 0.470        | 0.449        | <b>0.526</b> | 0.453        |
| libras                  | 0.462        | 0.461        | 0.492        | <b>0.580</b> | 0.478        | 0.428        | 0.477        |
| madelon                 | 0.413        | 0.416        | 0.306        | 0.301        | 0.385        | 0.304        | <b>0.440</b> |
| multiple-features       | 0.587        | 0.588        | <b>0.635</b> | 0.627        | 0.533        | 0.565        | 0.521        |
| parkinsons              | <b>0.719</b> | 0.682        | 0.659        | 0.585        | 0.555        | 0.707        | 0.572        |
| pendigits               | 0.680        | <b>0.705</b> | 0.630        | 0.591        | 0.653        | 0.498        | 0.612        |
| pima-indians            | 0.745        | <b>0.749</b> | 0.699        | 0.653        | 0.717        | 0.590        | 0.701        |
| sonar                   | 0.510        | 0.518        | 0.518        | 0.536        | <b>0.547</b> | 0.480        | 0.526        |
| spect-heart             | 0.263        | 0.260        | 0.219        | 0.227        | 0.246        | 0.205        | <b>0.287</b> |
| statlog-satimage        | <b>0.801</b> | 0.794        | 0.629        | 0.648        | 0.415        | 0.508        | 0.397        |
| statlog-segment         | 0.832        | 0.784        | <b>0.843</b> | 0.750        | 0.728        | 0.778        | 0.795        |
| statlog-vehicle         | <b>0.607</b> | 0.599        | 0.581        | 0.511        | 0.533        | 0.545        | 0.513        |
| synthetic-control-chart | 0.726        | 0.765        | 0.776        | <b>0.819</b> | 0.734        | 0.631        | 0.596        |
| vertebral-column        | <b>0.592</b> | 0.551        | 0.533        | 0.451        | 0.500        | 0.454        | 0.487        |
| wall-following-robot    | <b>0.621</b> | 0.551        | 0.505        | 0.518        | 0.465        | 0.539        | 0.457        |
| waveform-1              | <b>0.660</b> | 0.658        | 0.514        | 0.539        | 0.452        | 0.470        | 0.419        |
| waveform-2              | <b>0.654</b> | 0.649        | 0.520        | 0.546        | 0.458        | 0.476        | 0.427        |
| wine                    | 0.789        | 0.790        | 0.780        | 0.754        | 0.779        | <b>0.921</b> | 0.696        |
| yeast                   | 0.376        | 0.380        | 0.393        | 0.399        | <b>0.406</b> | 0.405        | 0.391        |
| average rank            | 3.190        | 3.224        | 3.672        | 4.224        | 4.448        | 4.603        | 4.638        |

Table 15: Low clustered anomalies at rate 0.1 within the training data.

| problem              | OCSVM        | KNN          | LOF          | LODA         | iForest      | FRAC         | PCA   |
|----------------------|--------------|--------------|--------------|--------------|--------------|--------------|-------|
| abalone              | 0.352        | 0.513        | 0.452        | 0.458        | 0.397        | <b>0.551</b> | 0.492 |
| blood-transfusion    | <b>0.507</b> | 0.398        | 0.428        | 0.391        | 0.437        | 0.325        | 0.431 |
| breast-tissue        | <b>0.436</b> | 0.403        | 0.402        | 0.394        | 0.383        | 0.369        | 0.340 |
| cardiotocography     | 0.465        | 0.354        | 0.525        | 0.550        | <b>0.579</b> | 0.287        | 0.317 |
| ecoli                | 0            | <b>0.844</b> | 0.776        | 0.789        | 0.805        | 0.775        | 0.811 |
| glass                | 0.691        | 0.609        | 0.674        | 0.529        | 0.436        | <b>0.789</b> | 0.741 |
| haberman             | <b>0.420</b> | 0.377        | 0.393        | 0.346        | 0.391        | 0.370        | 0.326 |
| ionosphere           | 0            | <b>0.926</b> | 0.843        | <b>0.926</b> | 0.821        | 0.797        | 0     |
| iris                 | 0.867        | 0.880        | 0.780        | <b>0.970</b> | 0.871        | 0.575        | 0.528 |
| libras               | <b>0.728</b> | 0.495        | 0.514        | 0.453        | 0.472        | 0.479        | 0.474 |
| parkinsons           | 0.657        | 0.602        | 0.546        | 0.644        | 0.587        | <b>0.688</b> | 0.659 |
| pendigits            | <b>0.985</b> | 0.975        | 0.974        | 0.895        | 0.914        | 0.892        | 0.911 |
| sonar                | 0.504        | 0.447        | 0.389        | <b>0.512</b> | 0.505        | 0.496        | 0.408 |
| spect-heart          | 0.150        | 0.135        | 0.133        | 0.205        | 0.203        | <b>0.223</b> | 0.169 |
| statlog-satimage     | <b>0.951</b> | 0.921        | 0.934        | 0.862        | 0.896        | 0.394        | 0.404 |
| statlog-segment      | 0.938        | 0.922        | 0.901        | <b>0.949</b> | 0.873        | 0.837        | 0.760 |
| vertebral-column     | 0.341        | 0.321        | 0.358        | 0.350        | 0.340        | <b>0.373</b> | 0.347 |
| wall-following-robot | 0.749        | 0.635        | 0.493        | <b>0.834</b> | 0.746        | 0.477        | 0.513 |
| wine                 | <b>0.976</b> | 0.962        | 0.970        | 0.910        | 0.866        | 0.873        | 0.947 |
| yeast                | 0.348        | 0.342        | <b>0.369</b> | 0.292        | 0.307        | 0.333        | 0.364 |
| average rank         | 3.100        | 3.650        | 3.825        | 3.900        | 4.175        | 4.650        | 4.700 |

Table 16: Medium clustered anomalies at rate 0 within the training data.

| problem              | iForest      | LODA         | LOF          | KNN          | FRAC         | PCA          | OCSVM |
|----------------------|--------------|--------------|--------------|--------------|--------------|--------------|-------|
| abalone              | 0.723        | 0.796        | 0.807        | <b>0.868</b> | 0.833        | 0.840        | 0.628 |
| cardiotocography     | <b>0.437</b> | 0.429        | 0.384        | 0.291        | 0.301        | 0.297        | 0.380 |
| isolet               | 0.110        | —            | —            | —            | <b>0.113</b> | —            | —     |
| letter-recognition   | <b>0.107</b> | —            | —            | —            | 0.105        | —            | —     |
| multiple-features    | 0.909        | 0.883        | <b>0.973</b> | 0.924        | 0.507        | 0.495        | 0.145 |
| pendigits            | 0.934        | 0.912        | <b>0.984</b> | 0.973        | 0.896        | 0.927        | 0.833 |
| statlog-satimage     | 0.475        | 0.459        | <b>0.606</b> | 0.529        | 0.421        | 0.415        | 0.501 |
| statlog-segment      | 0.375        | 0.417        | <b>0.736</b> | 0.661        | 0.726        | 0.533        | 0.485 |
| statlog-vehicle      | 0.577        | <b>0.605</b> | 0.470        | 0.517        | 0.505        | 0.509        | 0.440 |
| wall-following-robot | 0.463        | <b>0.530</b> | 0.457        | 0.401        | 0.366        | 0.384        | 0.376 |
| waveform-1           | 0.649        | <b>0.756</b> | 0.677        | 0.457        | 0.128        | 0.157        | 0.594 |
| waveform-2           | <b>0.772</b> | 0.755        | 0.258        | 0.332        | 0.102        | 0.167        | 0.363 |
| yeast                | 0.473        | 0.475        | 0.462        | 0.454        | 0.473        | <b>0.484</b> | 0.454 |
| average rank         | 3.038        | 3.038        | 3.077        | 3.962        | 4.577        | 4.731        | 5.577 |

Table 17: Medium clustered anomalies at rate 0.005 within the training data.

| problem                 | iForest      | LODA         | LOF          | KNN   | PCA          | FRAC         | OCSVM |
|-------------------------|--------------|--------------|--------------|-------|--------------|--------------|-------|
| abalone                 | 0.761        | <b>0.795</b> | 0.621        | 0.723 | 0.677        | 0.691        | 0.436 |
| blood-transfusion       | <b>0.821</b> | 0.800        | 0.772        | 0.780 | 0.767        | 0.682        | 0.717 |
| breast-cancer-wisconsin | <b>0.933</b> | 0.926        | 0.894        | 0.882 | 0.928        | 0.865        | 0.769 |
| cardiotocography        | <b>0.448</b> | 0.443        | 0.359        | 0.269 | 0.277        | 0.281        | 0.369 |
| multiple-features       | 0.909        | 0.873        | <b>0.955</b> | 0.777 | 0.437        | 0.486        | —     |
| pendigits               | 0.876        | 0.847        | <b>0.955</b> | 0.916 | 0.850        | 0.806        | 0.761 |
| pima-indians            | 0.402        | 0.417        | 0.342        | 0.372 | 0.394        | <b>0.427</b> | 0.316 |
| statlog-satimage        | 0.450        | 0.433        | <b>0.538</b> | 0.463 | 0.371        | 0.398        | 0.495 |
| statlog-segment         | 0.396        | 0.429        | 0.656        | 0.585 | 0.528        | <b>0.705</b> | 0.497 |
| statlog-vehicle         | 0.606        | <b>0.632</b> | 0.450        | 0.505 | 0.524        | 0.524        | 0.437 |
| synthetic-control-chart | 0.759        | 0.709        | <b>0.948</b> | 0.746 | 0.641        | 0.542        | 0.814 |
| vertebral-column        | 0.559        | <b>0.613</b> | 0.398        | 0.479 | 0.478        | 0.499        | 0.400 |
| wall-following-robot    | 0.544        | <b>0.597</b> | 0.518        | 0.400 | 0.430        | 0.381        | 0.431 |
| yeast                   | 0.370        | 0.365        | 0.358        | 0.342 | <b>0.399</b> | 0.371        | 0.375 |
| average rank            | 2.714        | 2.821        | 3.714        | 4.393 | 4.429        | 4.714        | 5.214 |

Table 18: Medium clustered anomalies at rate 0.01 within the training data.

| problem              | iForest      | LODA         | FRAC         | OCSVM        | PCA          | KNN   | LOF          |
|----------------------|--------------|--------------|--------------|--------------|--------------|-------|--------------|
| abalone              | 0.275        | 0.322        | <b>0.545</b> | 0.323        | 0.466        | 0.452 | 0.426        |
| blood-transfusion    | 0.367        | 0.349        | 0.287        | <b>0.483</b> | 0.402        | 0.337 | 0.355        |
| breast-tissue        | 0.380        | 0.378        | 0.350        | <b>0.410</b> | 0.330        | 0.391 | 0.365        |
| cardiotocography     | <b>0.469</b> | 0.420        | 0.227        | 0.376        | 0.231        | 0.224 | 0.262        |
| ecoli                | <b>0.735</b> | 0.719        | 0.644        | 0            | 0.713        | 0.627 | 0.597        |
| glass                | 0.419        | 0.428        | <b>0.662</b> | 0.473        | 0.601        | 0.503 | 0.622        |
| haberman             | 0.399        | 0.332        | 0.368        | <b>0.408</b> | 0.337        | 0.371 | 0.404        |
| ionosphere           | 0.644        | <b>0.724</b> | 0.714        | 0            | 0            | 0.620 | 0.561        |
| iris                 | 0.829        | <b>0.865</b> | 0.549        | 0.664        | 0.496        | 0.814 | 0.745        |
| libras               | 0.366        | 0.363        | <b>0.411</b> | 0.345        | 0.406        | 0.293 | 0.226        |
| parkinsons           | 0.499        | <b>0.562</b> | 0.410        | 0.395        | 0.416        | 0.450 | 0.472        |
| pendigits            | <b>0.673</b> | 0.664        | 0.502        | 0.627        | 0.619        | 0.489 | 0.342        |
| sonar                | 0.403        | 0.421        | <b>0.474</b> | 0.211        | 0.330        | 0.269 | 0.324        |
| spect-heart          | 0.193        | 0.191        | <b>0.225</b> | 0.144        | 0.170        | 0.133 | 0.119        |
| statlog-satimage     | <b>0.776</b> | 0.769        | 0.377        | 0.636        | 0.375        | 0.555 | 0.355        |
| statlog-segment      | 0.787        | <b>0.824</b> | 0.705        | 0.662        | 0.636        | 0.744 | 0.549        |
| vertebral-column     | 0.305        | 0.310        | <b>0.364</b> | 0.320        | 0.332        | 0.314 | 0.330        |
| wall-following-robot | <b>0.434</b> | 0.429        | 0.176        | 0.426        | 0.243        | 0.250 | 0.352        |
| wine                 | 0.818        | 0.802        | 0.566        | 0.604        | 0.712        | 0.814 | <b>0.953</b> |
| yeast                | 0.270        | 0.247        | 0.266        | 0.309        | <b>0.325</b> | 0.266 | 0.252        |
| average rank         | 2.925        | 3.275        | 4            | 4.200        | 4.325        | 4.575 | 4.700        |

Table 19: Medium clustered anomalies at rate 0.05 within the training data.

| problem              | OCSVM        | LODA         | iForest | LOF          | PCA          | FRAC         | KNN   |
|----------------------|--------------|--------------|---------|--------------|--------------|--------------|-------|
| abalone              | 0.411        | 0.273        | 0.248   | 0.435        | 0.412        | <b>0.477</b> | 0.390 |
| blood-transfusion    | <b>0.529</b> | 0.348        | 0.407   | 0.402        | 0.446        | 0.241        | 0.342 |
| breast-tissue        | <b>0.345</b> | 0.289        | 0.288   | 0.304        | 0.238        | 0.260        | 0.303 |
| ecoli                | 0            | 0.667        | 0.657   | 0.356        | <b>0.669</b> | 0.604        | 0.564 |
| glass                | 0.461        | 0.391        | 0.404   | 0.585        | 0.535        | <b>0.620</b> | 0.421 |
| iris                 | 0.607        | <b>0.780</b> | 0.744   | 0.697        | 0.468        | 0.535        | 0.729 |
| libras               | 0.298        | 0.210        | 0.198   | 0.212        | <b>0.397</b> | 0.396        | 0.252 |
| parkinsons           | 0.477        | <b>0.761</b> | 0.713   | 0.645        | 0.421        | 0.481        | 0.504 |
| pendigits            | <b>0.538</b> | 0.480        | 0.496   | 0.401        | 0.433        | 0.390        | 0.399 |
| sonar                | 0.207        | 0.321        | 0.310   | 0.257        | 0.341        | <b>0.428</b> | 0.204 |
| spect-heart          | 0.152        | 0.193        | 0.202   | 0.129        | 0.177        | <b>0.230</b> | 0.142 |
| statlog-satimage     | 0.565        | <b>0.680</b> | 0.658   | 0.421        | 0.364        | 0.387        | 0.448 |
| statlog-segment      | 0.591        | <b>0.699</b> | 0.648   | 0.487        | 0.584        | 0.613        | 0.616 |
| vertebral-column     | 0.399        | 0.295        | 0.330   | <b>0.419</b> | 0.332        | 0.342        | 0.330 |
| wall-following-robot | 0.448        | 0.337        | 0.339   | <b>0.515</b> | 0.201        | 0.168        | 0.231 |
| wine                 | 0.569        | 0.676        | 0.666   | <b>0.885</b> | 0.619        | 0.489        | 0.564 |
| yeast                | 0.329        | 0.246        | 0.265   | 0.283        | <b>0.335</b> | 0.284        | 0.276 |
| average rank         | 3.588        | 3.647        | 3.765   | 3.853        | 4.206        | 4.235        | 4.706 |

Table 20: Medium clustered anomalies at rate 0.1 within the training data.

| problem           | OCSVM        | LODA         | LOF   | FRAC         | KNN   | iForest | PCA   |
|-------------------|--------------|--------------|-------|--------------|-------|---------|-------|
| abalone           | <b>0.537</b> | 0.381        | 0.385 | 0.355        | 0.305 | 0.406   | 0.346 |
| blood-transfusion | <b>0.593</b> | 0.334        | 0.511 | 0.251        | 0.450 | 0.481   | 0.497 |
| breast-tissue     | 0.348        | <b>0.357</b> | 0.287 | 0.321        | 0.310 | 0.326   | 0.246 |
| glass             | 0.722        | 0.601        | 0.687 | <b>0.824</b> | 0.640 | 0.349   | 0.762 |
| iris              | 0.853        | <b>0.967</b> | 0.727 | 0.508        | 0.867 | 0.862   | 0.442 |
| statlog-satimage  | <b>0.983</b> | 0.926        | 0.967 | 0.288        | 0.955 | 0.946   | 0.227 |
| statlog-segment   | 0.893        | 0.886        | 0.870 | <b>0.925</b> | 0.890 | 0.832   | 0.856 |
| average rank      | 2.143        | 3.714        | 3.857 | 4.286        | 4.286 | 4.286   | 5.429 |

Table 21: Highly clustered anomalies at rate 0 within the training data.

| problem              | iForest      | LODA         | OCSVM | LOF          | PCA          | FRAC         | KNN   |
|----------------------|--------------|--------------|-------|--------------|--------------|--------------|-------|
| abalone              | 0.418        | 0.443        | 0.403 | 0.362        | 0.438        | <b>0.459</b> | 0.385 |
| cardiotocography     | <b>0.521</b> | 0.510        | 0.360 | 0.287        | 0.149        | 0.143        | 0.123 |
| pendigits            | 0.865        | 0.816        | 0.810 | <b>0.956</b> | 0.858        | 0.813        | 0.937 |
| statlog-satimage     | <b>0.589</b> | 0.567        | 0.582 | 0.579        | 0.229        | 0.305        | 0.521 |
| statlog-segment      | 0.581        | 0.585        | 0.652 | 0.642        | 0.623        | <b>0.736</b> | 0.597 |
| statlog-vehicle      | 0.887        | <b>0.895</b> | 0.667 | 0.651        | 0.758        | 0.664        | 0.803 |
| wall-following-robot | 0.562        | <b>0.578</b> | 0.454 | 0.529        | 0.425        | 0.342        | 0.408 |
| yeast                | 0.287        | 0.272        | 0.316 | 0.287        | <b>0.368</b> | 0.283        | 0.255 |
| average rank         | 2.938        | 3.500        | 3.750 | 3.875        | 4            | 4.812        | 5.125 |

Table 22: Highly clustered anomalies at rate 0.005 within the training data.

| problem              | iForest      | LODA  | OCSVM        | PCA          | FRAC         | LOF          | KNN   |
|----------------------|--------------|-------|--------------|--------------|--------------|--------------|-------|
| abalone              | 0.366        | 0.398 | 0.397        | 0.413        | <b>0.444</b> | 0.313        | 0.353 |
| blood-transfusion    | 0.421        | 0.405 | <b>0.527</b> | 0.445        | 0.303        | 0.358        | 0.358 |
| cardiotocography     | <b>0.497</b> | 0.485 | 0.333        | 0.111        | 0.114        | 0.193        | —     |
| pendigits            | 0.836        | 0.792 | 0.780        | 0.850        | 0.775        | <b>0.925</b> | 0.871 |
| statlog-satimage     | <b>0.701</b> | 0.682 | 0.625        | 0.234        | 0.302        | 0.689        | 0.634 |
| statlog-segment      | 0.697        | 0.670 | 0.698        | 0.666        | <b>0.727</b> | 0.609        | 0.603 |
| vertebral-column     | 0.297        | 0.321 | 0.276        | 0.285        | <b>0.326</b> | 0.240        | 0.264 |
| wall-following-robot | <b>0.538</b> | 0.474 | 0.437        | 0.331        | 0.221        | 0.401        | 0.229 |
| yeast                | 0.193        | 0.195 | 0.249        | <b>0.274</b> | 0.204        | 0.188        | 0.186 |
| average rank         | 2.944        | 3.278 | 3.389        | 3.778        | 4.333        | 4.722        | 5.556 |

Table 23: Highly clustered anomalies at rate 0.01 within the training data.

| problem           | OCSVM        | iForest      | LODA         | LOF   | FRAC         | PCA   | KNN   |
|-------------------|--------------|--------------|--------------|-------|--------------|-------|-------|
| abalone           | <b>0.518</b> | 0.246        | 0.224        | 0.379 | 0.347        | 0.309 | 0.263 |
| blood-transfusion | <b>0.562</b> | 0.338        | 0.254        | 0.365 | 0.199        | 0.444 | 0.324 |
| breast-tissue     | <b>0.376</b> | 0.313        | 0.326        | 0.289 | 0.299        | 0.241 | 0.315 |
| glass             | 0.452        | 0.373        | 0.366        | 0.600 | <b>0.674</b> | 0.599 | 0.441 |
| iris              | 0.618        | 0.745        | <b>0.818</b> | 0.659 | 0.475        | 0.376 | 0.742 |
| statlog-satimage  | 0.694        | <b>0.785</b> | 0.765        | 0.291 | 0.287        | 0.212 | 0.278 |
| statlog-segment   | 0.605        | <b>0.719</b> | 0.704        | 0.362 | 0.662        | 0.642 | 0.540 |
| average rank      | 2.857        | 3.429        | 3.786        | 4.143 | 4.214        | 4.786 | 4.786 |

Table 24: Highly clustered anomalies at rate 0.05 within the training data.

| problem          | LODA         | iForest      | OCSVM | LOF   | FRAC         | PCA   | KNN   |
|------------------|--------------|--------------|-------|-------|--------------|-------|-------|
| glass            | 0.327        | 0.288        | 0.394 | 0.495 | <b>0.621</b> | 0.465 | 0.182 |
| iris             | <b>0.668</b> | 0.568        | 0.567 | 0.515 | 0.461        | 0.316 | 0.544 |
| statlog-satimage | 0.722        | <b>0.739</b> | 0.689 | 0.359 | 0.245        | 0.181 | 0.206 |
| average rank     | 2.667        | 3.167        | 3.167 | 3.667 | 4            | 5.667 | 5.667 |

Table 25: Highly clustered anomalies at rate 0.1 within the training data.
